# Supplementary material for: 30-day mortality after hip fracture surgery: Influence of postoperative factors
Source: PubMed Central journal article supplement (PMC7886122; doi:10.1371/journal.pone.0246963), 2021-02-16
Supplement: pone.0246963.s001.pdf [file pone.0246963.s001.pdf]

### 30-day mortality after hip fracture surgery: influence of postoperative factors.

Juan F Blanco, Carmen da Casa, Carmen Pablos-Hernández, Alfonso González-Ramírez, José Miguel Julián-Enríquez, Agustín Díaz-Álvarez

S1 Table. Descriptive data for pre-operative and post-operative studied variables including statistical comparisons between survival and 30-day mortality groups.

|                                           | Total population<br>(n=923) | Survival<br>(n=868)     | 30-day mortality<br>(n=55) | p-value          |
|-------------------------------------------|-----------------------------|-------------------------|----------------------------|------------------|
| <b>In-hospital stay derived variables</b> |                             |                         |                            |                  |
| <b>LOS (days)</b>                         | 8.65 ± 4.09<br>8 [1,37]     | 8.53 ± 3.82<br>8 [2,37] | 10.58 ± 6.87<br>8 [1,34]   | 0.099            |
| <b>Walking ability at discharge</b>       | 60.1%                       | 62.1%                   | 27.8%                      | <b>&lt;0.001</b> |
| <b>Pre-surgical clinical variables</b>    |                             |                         |                            |                  |
| <b>ASA</b>                                | 2.84 ± 0.56<br>3 [1,4]      | 2.81 ± 0.56<br>3 [1,4]  | 3.16 ± 0.60<br>3 [2,4]     | <b>&lt;0.001</b> |
| <b>ASA 3-4</b>                            | 76.1%                       | 75.3%                   | 89.1%                      | <b>0.020</b>     |
| <b>Charlson index</b>                     | 1.86 ± 1.64<br>2 [0,10]     | 1.82 ± 1.61<br>2 [0,10] | 2.49 ± 1.98<br>2 [0,8]     | <b>0.016</b>     |
| <b>Charlson index (grouped)</b>           |                             |                         |                            | <b>0.049</b>     |
| No comorbidity (0-1)                      | 48.6%                       | 49.2%                   | 40.0%                      |                  |
| Slight comorbidity (2)                    | 22.2%                       | 22.6%                   | 16.4%                      |                  |
| High comorbidity (≥3)                     | 29.1%                       | 28.2%                   | 43.9%                      | <b>0.015</b>     |
| <b>Cognitive impairment</b>               | 41.2%                       | 40.4%                   | 52.8%                      | 0.075            |
| <b>Antiplatelet treatment</b>             | 34.5%                       | 34.9%                   | 27.3%                      | 0.248            |
| Acetyl salicylic acid (≤100mg/day)        | 26.4%                       | 27.1%                   | 16.4%                      | 0.081            |
| Acetyl salicylic acid (300mg/day)         | 3.1%                        | 3.0%                    | 5.5%                       | 0.311            |
| Clopidogrel                               | 4.0%                        | 4.0%                    | 5.4%                       | 0.885            |
| Other strong antiplatelet agent           | 1.8%                        | 1.8%                    | 1.8%                       | 0.989            |
| <b>Anticoagulant treatment</b>            | 20.9%                       | 19.8%                   | 38.2%                      | <b>0.001</b>     |
| Acenocoumarol                             | 14.7%                       | 13.6%                   | 32.7%                      | <b>&lt;0.001</b> |
| Other DOACs                               | 6.3%                        | 6.3%                    | 5.5%                       | 0.794            |
| <b>Comorbidity</b>                        | 93.7%                       | 93.5%                   | 96.4%                      | 0.404            |
| <b>Cardiac comorbidity</b>                | 87.5%                       | 87.3%                   | 90.9%                      | 0.435            |
| High blood pressure                       | 74.8%                       | 75.0%                   | 70.9%                      | 0.498            |
| Dyslipidaemia                             | 39.2%                       | 39.3%                   | 36.4%                      | 0.662            |
| Chronic cardiac insufficiency             | 13.3%                       | 12.0%                   | 14.8%                      | <b>&lt;0.001</b> |
| Valvar heart disease                      | 9.4%                        | 9.0%                    | 16.4%                      | 0.070            |
| Arrhythmia                                | 22.0%                       | 20.9%                   | 40.0%                      | <b>0.001</b>     |
| Ischemic heart failure                    | 12.9%                       | 12.4%                   | 21.8%                      | <b>0.042</b>     |

|                                                       | <b>Total population</b><br>(n=923) | <b>Survival</b><br>(n=868) | <b>30-day mortality</b><br>(n=55) | <b>p-value</b> |
|-------------------------------------------------------|------------------------------------|----------------------------|-----------------------------------|----------------|
| Diabetes                                              | 26.8%                              | 26.8%                      | 27.3%                             | 0.938          |
| <b>Pulmonary comorbidity</b>                          | 17.9%                              | 17.7%                      | 21.8%                             | 0.436          |
| COPD                                                  | 10.1%                              | 9.6%                       | 18.2%                             | <b>0.040</b>   |
| Pulmonary emphysema                                   | 0.8%                               | 0.7%                       | 1.8%                              | 0.351          |
| Pulmonary thromboembolism                             | 3.5%                               | 3.5%                       | 3.6%                              | 0.946          |
| Asthma                                                | 5.4%                               | 5.4%                       | 5.5%                              | 0.993          |
| <b>Digestive comorbidity</b>                          | 28.5%                              | 28.6%                      | 27.3%                             | 0.832          |
| Hiatal hernia                                         | 6.0%                               | 5.7%                       | 10.9%                             | 0.111          |
| Chronic gastritis                                     | 1.8%                               | 2.0%                       | -                                 | 0.294          |
| Diverticulitis                                        | 5.0%                               | 4.8%                       | 7.3%                              | 0.424          |
| Gastric ulcer or Duodenal ulcer                       | 4.3%                               | 4.4%                       | 3.6%                              | 0.791          |
| Gastroesophageal reflux                               | 1.4%                               | 1.4%                       | 1.8%                              | 0.792          |
| Chronic diarrhoea                                     | 0.2%                               | 0.2%                       | -                                 | 0.721          |
| Other hepatic-pancreatic-biliary comorbidity          | 15.8%                              | 16.3%                      | 7.3%                              | 0.075          |
| <b>Renal comorbidity</b>                              | 16.7%                              | 16.4%                      | 21.8%                             | 0.296          |
| Chronic renal insufficiency                           | 14.7%                              | 14.2%                      | 21.8%                             | 0.122          |
| Recurrent urinary tract infections                    | 2.7%                               | 2.9%                       | -                                 | 0.201          |
| <b>History of malignancy</b>                          | 23.0%                              | 22.6%                      | 29.1%                             | 0.270          |
| Digestive cancer                                      | 5.2%                               | 5.1%                       | 7.3%                              | 0.478          |
| Renal cancer                                          | 5.0%                               | 5.0%                       | 5.5%                              | 0.872          |
| Pulmonary cancer                                      | 0.9%                               | 0.7%                       | 3.6%                              | <b>0.023</b>   |
| Gynaecological cancer                                 | 3.9%                               | 4.0%                       | 2.8%                              | 0.409          |
| Endocrine cancer                                      | 0.2%                               | 0.1%                       | 1.8%                              | <b>0.009</b>   |
| Haematological cancer                                 | 1.3%                               | 1.3%                       | 1.8%                              | 0.729          |
| Other previous cancer                                 | 9.1%                               | 9.1%                       | 9.1%                              | 0.994          |
| <b>Post-surgical clinical variables</b>               |                                    |                            |                                   |                |
| <b>Surgical-derived complications</b>                 | 25.9%                              | 26.2%                      | 21.8%                             | 0.473          |
| <b>In-hospital surgical-derived complications</b>     | 23.2%                              | 23.4%                      | 20.0%                             | 0.562          |
| <b>Seroma</b>                                         | 20.5%                              | 20.7%                      | 16.4%                             | 0.435          |
| <b>Intraoperative fracture</b>                        | 0.4%                               | 0.5%                       | -                                 | 0.613          |
| <b>Out-of-hospital surgical-derived complications</b> | 3.6%                               | 3.6%                       | 3.6%                              | 0.986          |
| <b>Reoperation</b>                                    |                                    |                            |                                   | 0.097          |
| Cut in                                                | 0.2%                               | 0.2%                       | -                                 |                |
| Cut out                                               | 2.0%                               | 2.1%                       | -                                 |                |
| Dislocation*                                          | 1.7%                               | 1.3%                       | 8.0%                              | <b>0.013</b>   |

|                                                     | <b>Total<br/>population<br/>(n=923)</b> | <b>Survival<br/>(n=868)</b> | <b>30-day<br/>mortality<br/>(n=55)</b> | <b>p-value</b>   |
|-----------------------------------------------------|-----------------------------------------|-----------------------------|----------------------------------------|------------------|
| <b>Prosthesis infection</b>                         | 0.9%                                    | 0.9%                        | -                                      | 0.473            |
| <b>Medical complication</b>                         | 76.9%                                   | 75.9%                       | 92.7%                                  | <b>0.004</b>     |
| <b>Renal complication</b>                           | 33.8%                                   | 33.1%                       | 45.5%                                  | 0.060            |
| Postsurgical renal<br>insufficiency (grouped)       | 7.8%                                    | 6.7%                        | 25.5%                                  | <b>&lt;0.001</b> |
| <i>Acute renal<br/>insufficiency</i>                | 4.6%                                    | 4.1%                        | 12.7%                                  | <b>&lt;0.001</b> |
| <i>Chronic renal<br/>insufficiency</i>              | 3.3%                                    | 2.7%                        | 12.7%                                  |                  |
| Acute urine retention                               | 27.5%                                   | 27.8%                       | 23.6%                                  | 0.505            |
| Urine tract infection                               | 3.4%                                    | 3.5%                        | 1.8%                                   | 0.509            |
| <b>Digestive complications</b>                      | 24.8%                                   | 24.55                       | 29.1%                                  | 0.448            |
| Constipation                                        | 23.5%                                   | 23.4%                       | 25.5%                                  | 0.725            |
| Diarrhoea                                           | 0.5%                                    | 0.6%                        | -                                      | 0.571            |
| Paralytic ileum                                     | 1.1%                                    | 0.8%                        | 5.5%                                   | <b>0.001</b>     |
| Upper digestive<br>haemorrhage                      | 0.4%                                    | 0.3%                        | 1.8%                                   | 0.108            |
| Lower digestive<br>haemorrhage                      | 0.4%                                    | 0.3%                        | -                                      | 0.662            |
| Hepatic-pancreatic-biliary<br>complication          | 0.4%                                    | 0.3%                        | 1.8%                                   | 0.108            |
| <b>Cardiac complication</b>                         | 7.2%                                    | 4.7%                        | 45.5%                                  | <b>&lt;0.001</b> |
| Arrhythmia                                          | 3.1%                                    | 2.0%                        | 21.8%                                  | <b>&lt;0.001</b> |
| Cardiac insufficiency                               | 5.0%                                    | 3.4%                        | 30.9%                                  | <b>&lt;0.001</b> |
| Acute heart failure                                 | 0.3%                                    | 0.3%                        | -                                      | 0.662            |
| <b>Respiratory complication</b>                     | 15.8%                                   | 13.5%                       | 19.3%                                  | <b>&lt;0.001</b> |
| Postsurgical respiratory<br>insufficiency (grouped) | 12.7%                                   | 10.6%                       | 45.5%                                  | <b>&lt;0.001</b> |
| <i>Acute respiratory<br/>insufficiency</i>          | 10.2%                                   | 8.2%                        | 41.8%                                  | <b>&lt;0.001</b> |
| <i>Chronic respiratory<br/>insufficiency</i>        | 2.5%                                    | 2.4%                        | 3.7%                                   |                  |
| Upper respiratory<br>infection                      | 3.6%                                    | 3.1%                        | 10.9%                                  | <b>0.003</b>     |
| Pneumonia                                           | 0.7%                                    | 0.6%                        | 1.8%                                   | 0.267            |
| Pulmonary<br>thromboembolism                        | 0.2%                                    | 0.1%                        | 1.8%                                   | <b>0.009</b>     |
| <b>Postsurgical sepsis</b>                          | 0.5%                                    | 0.2%                        | 5.5%                                   | <b>&lt;0.001</b> |
| <b>Nutritional requirement</b>                      | 10.6%                                   | 9.5%                        | 27.3%                                  | <b>&lt;0.001</b> |
| <b>Postsurgical dysphagia</b>                       | 1.6%                                    | 1.5%                        | 3.6%                                   | 0.227            |
| <b>Diabetic decompensation</b>                      | 4.2%                                    | 4.0%                        | 7.3%                                   | 0.249            |
| <b>Postsurgical pressure ulcer</b>                  | 1.4%                                    | 1.4%                        | 1.8%                                   | 0.794            |
| <b>Postsurgical venous<br/>thrombosis</b>           | -                                       | -                           | -                                      |                  |

|                                                            | <b>Total<br/>population<br/>(n=923)</b> | <b>Survival<br/>(n=868)</b>      | <b>30-day<br/>mortality<br/>(n=55)</b> | <b>p-value</b>           |
|------------------------------------------------------------|-----------------------------------------|----------------------------------|----------------------------------------|--------------------------|
| <b>Postsurgical blood transfusion</b>                      | 39.0%                                   | 39.4%                            | 32.7%                                  | 0.324                    |
| <b>Postsurgical intravenous iron administration</b>        | 7.8%                                    | 7.6%                             | 10.9%                                  | 0.383                    |
| <b>Neurological complication</b>                           | 16.4%                                   | 15.3%                            | 34.5%                                  | <b>&lt;0.001</b>         |
| Acute confusional syndrome                                 | 15.8%                                   | 14.8%                            | 30.9%                                  | <b>0.002</b>             |
| Stroke                                                     | 0.5%                                    | 0.2%                             | 5.5%                                   | <b>&lt;0.001</b>         |
| Convulsions                                                | 6.0%                                    | 6.0%                             | -                                      | 0.662                    |
| Subdural hematoma                                          | -                                       | -                                | -                                      |                          |
| <b>Metabolic misbalance</b>                                | 17.2%                                   | 15.8%                            | 38.2%                                  | <b>&lt;0.001</b>         |
| <b>Sodium deregulation</b>                                 | 7.7%                                    | 7.1%                             | 18.2%                                  | <b>0.003</b>             |
| Hypernatremia                                              | 2.6%                                    | 2.3%                             | 7.3%                                   | <b>0.025</b>             |
| Hyponatremia                                               | 5.1%                                    | 4.7%                             | 10.9%                                  | <b>0.044</b>             |
| <b>Potassium deregulation</b>                              | 7.3%                                    | 6.1%                             | 25.5%                                  | <b>&lt;0.001</b>         |
| Hyperkalaemia                                              | 5.2%                                    | 4.7%                             | 12.7%                                  | <b>&lt;0.001</b>         |
| Hypokalaemia                                               | 6.8%                                    | 6.6%                             | 10.9%                                  | <b>0.010</b>             |
| <b>Calcium complication<br/>(hypercalcaemia)</b>           | 6.8%                                    | 6.6%                             | 10.9%                                  | 0.218                    |
| Hypocalcaemia                                              | -                                       | -                                | -                                      |                          |
| <b>Laboratory variables</b>                                |                                         |                                  |                                        |                          |
| <b>Admission haemoglobin<br/>(g/dl)</b>                    | 12.62 ± 1.72<br>12.7 [5.6,17.5]         | 12.62 ± 1.68<br>12.7 [5.6,17.5]  | 12.585 ± 2.28<br>12.5 [8.0,17.5]       | 0.368                    |
| Haemoglobin level<br>≤10g/dl                               | 6.6%                                    | 6.5%                             | 8.2%                                   | 0.448                    |
| <b>Admission lymphocyte count<br/>(x10<sup>3</sup>/μl)</b> | 1.28 ± 0.92<br>1.1 [0.25,16.15]         | 1.28 ± 0.84<br>1.13 [0.25,16.15] | 1.31 ± 1.74<br>0.93 [0.32,13.09]       | <b>0.019</b>             |
| <b>Admission lymphocyte count<br/>(grouped)</b>            |                                         |                                  |                                        | 0.079                    |
| Lymphocyte level<br><0.5 x10 <sup>3</sup> /μl              | 5.5%                                    | 5.3%                             | 9.1%                                   |                          |
| Lymphocyte level<br><1 x10 <sup>3</sup> /μl                | 42.1%                                   | 41.2%                            | 56.4%                                  | <b>0.027<sup>a</sup></b> |
| Lymphocyte level<br>0.5-1 x10 <sup>3</sup> /μl             | 36.6%                                   | 35.9%                            | 47.3%                                  |                          |
| Lymphocyte level<br>1-2.5 x10 <sup>3</sup> /μl             | 52.9%                                   | 53.9%                            | 36.4%                                  |                          |
| Lymphocyte level<br>>2.5 x10 <sup>3</sup> /μl              | 5.0%                                    | 4.8%                             | 8.7%                                   |                          |
| <b>Admission Albumin<br/>(g/dl)</b>                        | 3.92 ± 0.43<br>4 [2.3,5.1]              | 3.93 ± 0.42<br>4 [2.3,5.1]       | 3.80 ± 0.50<br>3.85 [2.8,4.8]          | 0.061                    |
| <b>Admission Albumin<br/>(grouped)</b>                     |                                         |                                  |                                        | <b>0.026</b>             |
| Albumin level<br><3.5 g/dl                                 | 17.8%                                   | 16.8%                            | 33.3%                                  | <b>0.009<sup>b</sup></b> |
| Albumin level<br>3.5-4 g/dl                                | 41.1%                                   | 41.7%                            | 33.3%                                  |                          |

|                                                            | Total population<br>(n=923)       | Survival<br>(n=868)              | 30-day mortality<br>(n=55)        | p-value            |
|------------------------------------------------------------|-----------------------------------|----------------------------------|-----------------------------------|--------------------|
| Albumin level<br>4-4.5 g/dl                                | 36.6%                             | 37.2%                            | 27.1%                             |                    |
| Albumin level<br>>4.5 g/dl                                 | 4.5%                              | 4.3%                             | 6.3%                              | <b>0.049</b>       |
| <b>Admission glucose<br/>(mg/dl)</b>                       | 143.5 ± 49.0<br>132 [65,628]      | 149.0 ± 49.5<br>131 [65,628]     | 146.0 ± 41.2<br>136 [84,263]      | 0.414              |
| <b>Admission glucose<br/>(grouped)</b>                     |                                   |                                  |                                   | 0.928              |
| Glucose level<br><100 mg/dl                                | 8.0%                              | 8.0%                             | 7.5%                              |                    |
| Glucose level >110mg/dl                                    | 78.9%                             | 78.7%                            | 83.0%                             | 0.450 <sup>c</sup> |
| Glucose level<br>100-120 mg/dl                             | 26.3%                             | 26.6%                            | 22.6%                             |                    |
| Glucose level<br>120-140 mg/dl                             | 27.1%                             | 27.0%                            | 28.3%                             |                    |
| Glucose level<br>>140 mg/dl                                | 38.6%                             | 38.4%                            | 41.5%                             |                    |
| <b>Parathyroid hormone<br/>(mg/dl)<sup>d</sup></b>         | 72.95 ± 52.05<br>59.6 [6.4,437.6] | 71.97 ± 48.09<br>59.6 [6.4,371]  | 90.08 ± 99.3<br>72.6 [13.9,437.6] | 0.919              |
| <b>Vitamin D<br/>(mg/dl)<sup>e</sup></b>                   | 12.11 ± 8.83<br>9.15 [1.0,57.7]   | 12.06 ± 8.69<br>9.1 [1.0,57.7]   | 13.06 ± 11.50<br>10.1 [3.0,40.2]  | 0.947              |
| <b>Discharge lymphocyte count<br/>(x10<sup>3</sup>/μl)</b> | 1.24 ± 0.76<br>1.10 [0.16,14.06]  | 1.24 ± 0.69<br>1.11 [0.16,14.06] | 1.26 ± 1.54<br>0.93 [0.22-10.1]   | <b>0.006</b>       |
| <b>Discharge albumin<br/>(g/dl)<sup>f</sup></b>            | 3.02 ± 0.40<br>3.0 [1.6,4.7]      | 3.01 ± 0.38<br>3.0 [1.6,4.7]     | 3.17 ± 0.61<br>3.05 [1.9,4.5]     | 0.262              |

LOS: Length of stay; DOACs: Direct Oral Anticoagulants. Frequencies are shown in percentages and quantitative variables are described by mean and standard deviation. P values are indicating differences between survival and 30-day mortality groups. Significant differences are marked in bold. \*Analysis include only arthroplasty patients (n=407, n=382 survival, n=25 30-day mortality). a: Comparison of lymphocyte count <10<sup>3</sup>/μl vs. ≥10<sup>3</sup>/μl. b: comparison of albumin admission level <3.5g/dl vs. ≥3.5g/dl. c: comparison of glucose admission level >110mg/dl vs. ≤110mg/dl. d: missing data, n=313 (n=17 30-day mortality). e: missing data, n=302 (n=15 30-day mortality). f: missing data, n=439.
