# Supplementary material for: 30-day mortality after hip fracture surgery: Influence of postoperative factors
Source: PubMed Central journal article supplement (PMC7886122; doi:10.1371/journal.pone.0246963), 2021-02-16
Supplement: pone.0246963.s002.pdf [file pone.0246963.s002.pdf]

## 30-day mortality after hip fracture surgery: influence of postoperative factors.

Juan F Blanco, Carmen da Casa, Carmen Pablos-Hernández, Alfonso González-Ramírez, José Miguel Julián-Enríquez, Agustín Díaz-Álvarez

S2 Table. Variables on the equation for the predictive model on 30-day mortality.

|                                                 | B      | Exp(B)   | EXP(B) 95% CI |         | Wald   | p-value |
|-------------------------------------------------|--------|----------|---------------|---------|--------|---------|
|                                                 |        |          | Lower         | Upper   |        |         |
| <b>Albumin admission level &lt;3.5g/dl</b>      | 1.479  | 4.389    | 1.301         | 14.808  | 5.684  | 0.017   |
| <b>Walking ability at discharge</b>             | -1.597 | 0.203    | 0.057         | 0.724   | 6.036  | 0.014   |
| <b>Nutritional supply requirement</b>           | 1.629  | 5.100    | 1.522         | 17.092  | 6.972  | 0.008   |
| <b>Post-surgical acute confusional syndrome</b> | 0.893  | 2.441    | 0.700         | 8.520   | 1.959  | 0.162   |
| <b>Post-surgical hyperkalaemia</b>              | 1.757  | 5.795    | 0.525         | 63.975  | 2.056  | 0.152   |
| <b>Post-surgical renal insufficiency</b>        | -0.906 | 0.404    | 0.066         | 2.464   | .965   | 0.326   |
| <b>Post-surgical respiratory insufficiency</b>  | 1.429  | 4.175    | 1.273         | 13.686  | 5.565  | 0.018   |
| <b>Post-surgical cardiac insufficiency</b>      | 2.568  | 13.040   | 3.516         | 48.358  | 14.747 | 0.000   |
| <b>Post-surgical sepsis</b>                     | 2.710  | 15.022   | 0.786         | 287.261 | 3.239  | 0.072   |
| <b>Post-surgical stroke</b>                     | 23.228 | 1.224e10 | 0.000         | .       | .000   | 0.999   |
| <b>Constant</b>                                 | -3.931 |          |               |         | 57.155 | 0.000   |

B: coefficient in equation. CI: confidence interval.
